# Supplementary material for: Autonomic control of cardiovascular adjustments associated with orthostasis in the scansorial snakeBoa constrictor
Source: Oxford University Press journal article supplement (doi:10.1242/jeb.197848), 2019-01-01
Supplement: jeb197848supp.pdf [file jeb197848supp.pdf]

## SUPPLEMENTARY MATERIAL

**Table S1. Mean arterial blood pressure (mean  $P_A$ ), heart rate ( $f_H$ ), power of the low-frequency spectrum band ( $P_{LF}$ ) and power of the high-frequency spectrum band ( $P_{HF}$ ) before and after intrarterial administration of saline solution (2 ml  $\text{kg}^{-1}$ ; 0.9% NaCl) in untreated horizontalized *B. constrictor* ( $N = 6$ ; paired data).**

|                             | Pre-saline      | Post-saline     |
|-----------------------------|-----------------|-----------------|
| Mean $P_A$ (kPa)            | $7.40 \pm 0.82$ | $7.42 \pm 0.83$ |
| $f_H$ (bpm)                 | $24.7 \pm 1.7$  | $25.1 \pm 1.6$  |
| $P_{LF}$ ( $\text{bpm}^2$ ) | $0.18 \pm 0.03$ | $0.19 \pm 0.06$ |
| $P_{HF}$ ( $\text{bpm}^2$ ) | $0.06 \pm 0.02$ | $0.06 \pm 0.02$ |

Values are means  $\pm$  SEM. No significant difference was detected between pre-saline and post-saline values (two-tailed paired t-test;  $p \leq 0.05$ ).

**Table S2. Mean arterial blood pressure (mean  $P_A$ ), heart rate ( $f_H$ ), power of the low-frequency spectrum band ( $P_{LF}$ ) and power of the high-frequency spectrum band ( $P_{HF}$ ) before and after intrarterial administration of acetylcholine (0.3 ml  $\text{kg}^{-1}$ ; 200  $\mu\text{g ml}^{-1}$ ) in horizontalized *B. constrictor* treated with atropine, propranolol and prazosin ( $N = 6$ ; paired data).**

|                             | Pre-acetylcholine | Post-acetylcholine |
|-----------------------------|-------------------|--------------------|
| Mean $P_A$ (kPa)            | $5.61 \pm 0.70$   | $5.56 \pm 0.68$    |
| $f_H$ (bpm)                 | $24.5 \pm 1.7$    | $24.2 \pm 1.5$     |
| $P_{LF}$ ( $\text{bpm}^2$ ) | $0.01 \pm 0.01$   | $0.00 \pm 0.00$    |
| $P_{HF}$ ( $\text{bpm}^2$ ) | $0.00 \pm 0.00$   | $0.00 \pm 0.00$    |

Values are means  $\pm$  SEM. No significant difference was detected between pre-acetylcholine and post-acetylcholine values (two-tailed paired t-test;  $p \leq 0.05$ ).

**Table S3. Mean arterial blood pressure (mean  $P_A$ ), heart rate ( $f_H$ ), power of the low-frequency spectrum band ( $P_{LF}$ ) and power of the high-frequency spectrum band ( $P_{HF}$ ) before and after intrarterial administration of adrenaline (0.3 ml  $\text{kg}^{-1}$ ; 200  $\mu\text{g ml}^{-1}$ ) in horizontalized *B. constrictor* treated with atropine, propranolol and prazosin ( $N = 6$ ; paired data).**

|                             | Pre-adrenaline  | Post-adrenaline |
|-----------------------------|-----------------|-----------------|
| Mean $P_A$ (kPa)            | $5.55 \pm 0.65$ | $5.50 \pm 0.63$ |
| $f_H$ (bpm)                 | $24.2 \pm 1.5$  | $23.4 \pm 1.1$  |
| $P_{LF}$ ( $\text{bpm}^2$ ) | $0.00 \pm 0.00$ | $0.00 \pm 0.00$ |
| $P_{HF}$ ( $\text{bpm}^2$ ) | $0.00 \pm 0.00$ | $0.00 \pm 0.00$ |

Values are means  $\pm$  SEM. No significant difference was detected between pre-adrenaline and post-adrenaline values (two-tailed paired t-test;  $p \leq 0.05$ ).

**Table S4. Power of the low-frequency spectrum band ( $P_{LF}$ ) and power of the high-frequency spectrum band ( $P_{HF}$ ) of untreated horizontalized *B. constrictor*, calculated from spectra generated using 64, 128 and 256 cardiac cycles ( $N = 6$ ; paired data).**

|                              | 64 cardiac cycles | 128 cardiac cycles | 256 cardiac cycles |
|------------------------------|-------------------|--------------------|--------------------|
| $P_{LF}$ (bpm <sup>2</sup> ) | 0.23 ± 0.07       | 0.17 ± 0.06        | 0.19 ± 0.09        |
| $P_{HF}$ (bpm <sup>2</sup> ) | 0.07 ± 0.02       | 0.08 ± 0.05        | 0.08 ± 0.05        |

Values are means ± SEM. Values are means ± SEM. No significant difference was detected between the different methods of analysis (one-way ANOVA for repeated measures;  $p \leq 0.05$ ; Holm-Šidák *post hoc* test;  $p \leq 0.05$ ).
